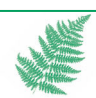

## Campos de Cima da Serra: the Brazilian Subtropical Highland Grasslands show an unexpected level of plant endemism

JOÃO R. V. IGANCI<sup>1\*</sup>, GUSTAVO HEIDEN<sup>2</sup>, SILVIA TERESINHA S. MIOTTO<sup>1</sup> and R. TOBY PENNINGTON<sup>3</sup>

<sup>1</sup>*Programa de Pós-Graduação em Botânica, Universidade Federal do Rio Grande do Sul, RS, Brazil*

<sup>2</sup>*Programa de Pós-Graduação em Botânica, Universidade de São Paulo, São Paulo, SP, Brazil*

<sup>3</sup>*Royal Botanic Garden Edinburgh, Tropical Diversity Section, Edinburgh, UK*

Received 13 May 2011; revised 8 July 2011; accepted for publication 15 August 2011

A high level of endemic flowering plant species is highlighted for the first time for the southern Brazilian flora. We present a comprehensive list of 1020 endemic taxa and analyse their distribution in different biomes, focusing on the Subtropical Highland Grasslands (Campos de Cima da Serra). Considering all biomes represented in southern Brazil, *c.* 13% of the flowering plant species are endemic, which accounts for more than 5% of the total endemic taxa of Brazil and *c.* 12% of the endemic taxa from the Atlantic Forest hotspot. Like the High Altitude Tropical Grasslands that are found further north in the south-eastern Brazil region, the Subtropical Highland Grasslands are home to an assemblage of tropical and temperate plant lineages. The Subtropical Highland Grasslands are characterized by their transitional nature and by having 296 endemic plant taxa (25% of its flora). © 2011 The Linnean Society of London, *Botanical Journal of the Linnean Society*, 2011, **167**, 378–393.

ADDITIONAL KEYWORDS: angiosperms – biogeography – conservation – diversity – endemic species.

### INTRODUCTION

South American savannas and grasslands harbour particular floras with a high level of endemism. However, these open vegetations are neglected when compared with the forests with regard to the priority given to research and conservation (Burman, 1991; Safford, 1999, 2007; Bilenca & Miñarro, 2004; Overbeck *et al.*, 2007).

The Campos de Cima da Serra are the southern Brazilian Subtropical Highland Grasslands. Studies focusing on this biome have suggested that they are neglected in conservation policies, and that information about their biodiversity is lacking (Giulietti *et al.*, 2005; Overbeck *et al.*, 2007). A compilation by Boldrini *et al.* (2009) for the Subtropical Highland Grasslands, including two (Rio Grande do Sul and Santa

Catarina) of the three states comprising the southern Brazilian Subtropical Highland Grasslands, estimated the existence of 1161 plant species, with 107 (9.21%) considered as endemic. Despite these recent reports, other publications covering grasslands from Brazil have considered the southern Brazilian grasslands as not satisfactorily known (Joly *et al.*, 1999; Alves & Kolbek, 2010). In an attempt to delineate the campos rupestres (rocky grasslands embedded within the tropical savannas) in comparison with other grass-rich vegetation from South America, Alves & Kolbek (2010) mentioned the high diversity of endemic species that characterize the grassy vegetation in the high-altitude mountains of south-eastern Brazil (to the north of the area of the current study). However, the Subtropical Highland Grasslands of southern Brazil were not included in their analysis, because the authors considered their flora as poorly known and interpreted it as representing a successional phase to forest vegetation.

\*Corresponding author. E-mail: joaoiganici@gmail.com

The present study arises from the need to characterize and delimit the southern Brazilian Subtropical Highland Grasslands and to recognize the distribution of the diversity of their endemic plants. We aim to characterize the southern Brazilian flora, looking for candidate plant taxa which could be recognized as indicators of the Subtropical Highland Grasslands biome, and to analyse its floristic similarity with the other adjacent biomes. We address the following questions. How high is the diversity of endemic plants in southern Brazil? Is it possible to characterize the Subtropical Highland Grasslands biome by the means of endemic taxa? Which other biomes are the Subtropical Highland Grasslands related to?

## MATERIAL AND METHODS

### STUDY AREA

The southern Brazilian Subtropical Highland Grasslands comprise 1 374 000 ha (Boldrini *et al.*, 2009), reaching to around 1800 m elevation on their eastern edge. This vegetation lies south of the Tropic of Capricorn, between 24°52'11"S and 29°26'40"S and between 49°27'11"W and 53°43'51"W. The Subtropical Highland Grasslands are underlain by effusive rocks of the Serra Geral Formation that originated between 120 and 135 Mya (Almeida, 2009). The climate is subtropical humid (Cfa) and temperate humid (Cfb) (Peel, Finlayson & McMahon, 2007), with rainfall throughout the year and an average temperature between 12 °C (mean minimum temperature in July, 10 °C) and 18 °C (mean maximum temperature in January, 27 °C) (Behling, 2002; Almeida, 2009).

### SPECIES LIST AND DISTRIBUTION

Two large databases concerning South American vegetation have been published recently and cover the study area. The *Catálogo de las Plantas Vasculares del Cono Sur* (Zuloaga, Morrone & Beltrano, 2008) lists all vascular plants from southern South America, including Argentina, Chile, Paraguay, Uruguay and the south of Brazil (Paraná, Santa Catarina and Rio Grande do Sul states). The other database is the *List of Species of the Brazilian Flora* (Forzza *et al.*, 2010), which covers all known plants and fungi from Brazil. Information from these databases was the source to elaborate a consensus checklist of endemic angiosperms from southern Brazil in the study presented here. To achieve this consensus list, all names were checked and the taxa assigned as endemic to southern Brazil were assembled in a new checklist. To combine the lists, an exhaustive search was carried out, and each taxon name was checked in nomenclatural databases (International Plant Names Index

(IPNI), 2008; Tropicos, 2011), protologues and taxonomic revisions. In addition, the checklist *Plantas da Floresta Atlântica* (Stehmann *et al.*, 2009), monographs, herbaria records, field observations and personal communications were considered to complement the final list and solve ambiguous and contradictory information amongst the original sources of data. The most recent changes in taxonomy and nomenclature were applied to make lists comparable, according to the Angiosperm Phylogeny Group (APG) III (2009) for family and genus levels and recent taxonomic revisions for genus and species levels. In the same way, data on the geographical distribution for each taxon, including the vegetation in which they occur, were compiled from the most representative herbaria covering the southern Brazilian flora [HBR, ICN, MBM, PACA, RB, SPF (abbreviations from Thiers, 2010)] and from databases of the Missouri Botanical Garden – Brazilian records (MOBOT\_BR), Smithsonian Department of Botany – Brazilian records (NMNH\_Botany\_BR) and The New York Botanical Garden – Brazilian records (NYBG\_BR), accessed through Species Link (CRIA, 2011). This review enabled the improvement of the checklist by eliminating incongruent names from the source lists (not validly published names, synonyms and taxa mistakenly considered as endemics).

Taxa with narrow distributions centred in southern Brazilian vegetation, but not endemic to southern Brazil, were not included in the present analysis. The vegetation in neighbouring regions (e.g. Tropical Forest and Tropical Highland Grasslands, in southeast Brazil) was not fully sampled here, leading to the omission of some taxa which were not exclusive to southern Brazil. Similarly, some taxa restricted to Low Altitude Temperate Grasslands and Temperate Shrubland, but not endemic to southern Brazil because their distribution range crosses the political limits with Uruguay and Argentina within the Pampean Domain, were also not included in the analysis.

### CATEGORIZATION OF VEGETATION

To analyse the distribution of endemics at a finer scale, the vegetation of southern Brazil was classified by a modification of the categories mapped by Leite (2002), who recognized ten different phytoecological units and three transitional vegetation areas in the south of Brazil on the basis of geology, terrain, climate and soil. For the present study, nine categories (biomes) were considered (Fig. 1): Tropical Forest (TRF), Tropical Savanna (TRS), Tropical Coastal Scrub (TCS), High Altitude Tropical Grasslands (HTG, synonymous with Campos de Altitude), Subtropical Seasonal Forest (SSF), Subtropical Mixed Forest (SMF), Subtropical Highland

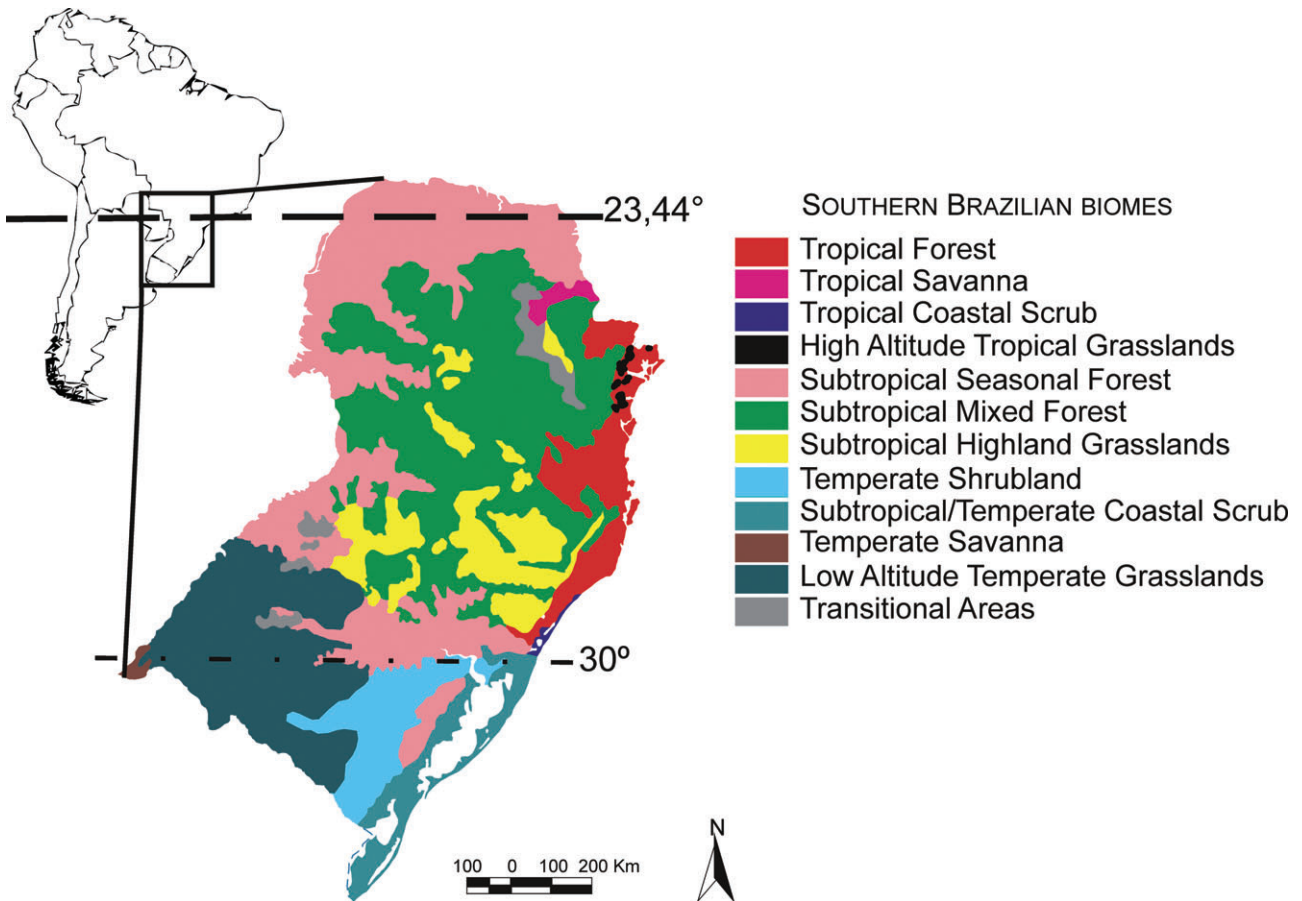

**Figure 1.** Vegetation in southern Brazil.

Grasslands (SHG, synonymous with Campos de Cima da Serra), Temperate Shrubland (TES) and Low Altitude Temperate Grasslands (LTG). The main differences between this classification and that of Leite (2002) is the separation of the High Altitude Tropical Grasslands and the Subtropical Highland Grasslands and of the Subtropical Scrub and the Low Altitude Temperate Grasslands, and the merging of different seasonal categories applied by Leite (2002) into a single unit called Subtropical Seasonal Forest. Areas defined as transitional by Leite (2002) and areas not relevant in the context of the current work (Subtropical/Temperate Coastal Scrub and Temperate Savanna) were mapped, but not included in the analysis. As the delimitation of the study area (southern Brazil) is essentially political, some of the biomes listed above are continuous in other Brazilian states or in adjacent countries, such as Argentina and Uruguay. For these biomes, only the portion included in southern Brazil was considered and analysed. However, the Subtropical Highland Grasslands, the main subject of this work, are completely included within the study area and were therefore analysed completely.

#### DATA ANALYSIS

All names were organized in tables, and taxa for which data on geographical distribution were unreliable were excluded from the analysis. The information on geographical distribution was organized into floristic matrices, consisting of binary presence–absence data for 965 taxa (descriptors) and nine sampling units (samples). Similarity between different sampling units was calculated by the Sørensen coefficient, and their relationships were investigated using the Unweighted Pair Group Method with Arithmetic Mean (UPGMA), applied in Fitopac 2.1.2.85 (Shepherd, 2010). To test the sharpness of groups, a method developed by Pillar (1999) was applied, using MULTIV 2.4.2 (Pillar, 2006). The separation of floristic groups, highlighting the indicator taxa for each sampling unit, was carried out using WinTWINS 2.3, TWINSPLAN for Windows (Hill & Šmilauer, 2005). The taxa which occur exclusively in each sample were considered as biome indicators. A Venn diagram (Venn, 1981) was elaborated to visualize both exclusive and shared endemic taxa among the main floristic areas identified in the similarity analy-

sis, considering four sampling units: Forests (TRF + SSF + SMF + TCS), Pampas (LTG + TES), High Altitude Grasslands (HAG: HTG + SHG) and Tropical Savanna (TRS).

RESULTS

The list of endemic taxa of angiosperms from southern Brazil, based only on the *Catálogo de las Plantas Vasculares del Cono Sur* (Zuloaga *et al.*, 2008), resulted in a total of 1249 taxa, including species, subspecies and varieties. However, when considering the list of endemics based only on the *List of Species of the Brazilian Flora* (Forzza *et al.*, 2010), 981 taxa were considered to be endemic to southern Brazil. When compared, the two lists showed only 646 names in common, and 48.27% (603 names) of the taxa cited as endemic from southern Brazil in the *Catálogo de las Plantas Vasculares del Cono Sur* were not considered as endemic in the *List of Species of the Brazilian Flora*. Similarly, 34.14% (335 names) of the taxa listed as endemic from southern Brazil in the *List of Species of the Brazilian Flora* were not considered to be endemic in the first list. Summarizing both lists into a single database, 938 names were incongruent and had to be checked through the review of protologues, taxonomic revisions, analysis of herbarium specimens and personal communication with experts on specific families.

The consensus list of endemic flowering plants from southern Brazil recognizes 1020 taxa at species, subspecies and variety levels, corresponding to 13% of all angiosperms from southern Brazil (7671 taxa) and 5.34% of the total (19 090 taxa) endemic flowering plants from Brazil (Forzza *et al.*, 2010). The complete list of endemic flowering plants from southern Brazil is provided as Supplementary Material (Table S1). The most important families with regard to the number of endemic taxa are Asteraceae (115), Orchidaceae (100) and Fabaceae (78), which are recognized as the three richest flowering plant families in the number of species worldwide. The genera with the largest numbers of endemic taxa in southern Brazil are *Mimosa* L. (Fabaceae) with 45 taxa, and *Baccharis* L. (Asteraceae) and *Begonia* L. (Begoniaceae) with 26 taxa each. Considering only the Subtropical Highland Grasslands, the most important families with regard to the number of endemic taxa are Asteraceae (56), Fabaceae (31) and Poaceae (26), and the genera with the highest levels of endemism are *Croton* L. (Euphorbiaceae) with 15 taxa, and *Mimosa* (Fabaceae) and *Nothoscordum* Kunth (Amaryllidaceae) with 14 taxa each.

Eight genera belonging to six families were recognized as endemic to southern Brazil. All are monotypic in their current circumscription and are

**Table 1.** Species belonging to endemic monotypic genera in southern Brazil

| Family      | Species                                | Biome |
|-------------|----------------------------------------|-------|
| Fabaceae    | <i>Sellocharis paradoxa</i> Taub.      | TES   |
| Iridaceae   | <i>Kelissa brasiliensis</i> (Baker)    | TES   |
|             | Ravenna                                |       |
|             | <i>Onira unguiculata</i> (Baker)       | LTG   |
| Malvaceae   | Ravenna                                | TCS   |
|             | <i>Calyptraemalva catharinensis</i>    | TRF   |
|             | Krapov.                                |       |
|             | <i>Tropidococcus pinnatipartitus</i>   | SMF   |
| Myrtaceae   | (A.St.-Hil. & Naudin) Krapov.          | TRF   |
|             | <i>Curitiba prismatica</i> (D.Legrand) | SMF   |
|             | Salywon & Landrum                      |       |
| Rutaceae    | <i>Raulinoa echinata</i> R.S.Cowan     | TRF   |
| Verbenaceae | <i>Verbenoxylum reitzii</i> (Moldenke) | TRF   |
|             | Tronc.                                 |       |

LTG, Low Altitude Temperate Grasslands; SMF, Subtropical Mixed Forest; TCS, Tropical Coastal Scrub; TES, Temperate Shrubland; TRF, Tropical Forest.

distributed in different vegetation formations, as shown in Table 1.

Among the biomes from southern Brazil, the Subtropical Highland Grasslands is the richest in endemic flowering plants, with 296 endemic taxa. The second richest is the Tropical Forest with 216 endemic taxa, and the third richest is the Subtropical Mixed Forest with 70 endemic taxa. The other endemic taxa are more or less equally distributed amongst the remaining six biomes. Fifty-five taxa were classified as having deficient data on their geographical distribution because of a lack of reliability of herbarium records or missing data, and these were not considered.

The grasslands of southern Brazil are frequently considered to be a single vegetation unit, known as ‘Campos Sulinos’ (Southern Grasslands), encompassing both the Subtropical Highland Grasslands (Campos de Cima da Serra) and the Pampas (Low Altitude Temperate Grasslands plus Subtropical Scrub). However, considering the geographical distribution of the endemic flora emphasizes that few taxa exclusive to southern Brazil are shared between the Subtropical Highland Grasslands and the Pampas. The Subtropical Highland Grasslands show a transitional pattern, sharing some taxa with the tropical grasslands from further north in Brazil (High Altitude Tropical Grasslands) and some taxa with the temperate grasslands from the Pampas Domain. Twenty-three taxa are shared with the High Altitude Tropical Grasslands and 12 between the Subtropical Highland Grasslands and the Pampas. However, when the

Pampas is compared with the High Altitude Tropical Grasslands from Serra do Mar, no taxa are shared, highlighting the temperate character of the Pampas and the tropical nature of Serra do Mar, and the discontinuity of distribution of southern Brazilian endemic taxa between them (Fig. 2A). In addition to these shared taxa, the uniqueness of the Subtropical Highland Grasslands is emphasized by the 296 endemic plant taxa, which could be considered as indicator species for the recognition of this biome. A complete list of endemic flowering plants from the Subtropical Highland Grasslands is presented in Table 2.

A comparison of taxa exclusive to southern Brazil, shared between the biomes analysed, shows low floristic similarity, as revealed in Table 3 (maximum Jaccard index of 0.1599 between Tropical Forest and Subtropical Mixed Forest). The present analysis considered only endemic taxa from southern Brazil (13% of the total flora), which probably influenced this low degree of similarity. Although the Subtropical Highland Grasslands share endemic taxa from southern Brazil with all other biomes within this region, there is no one biome to which it has a high degree of floristic similarity. Maximum similarity is with the High Altitude Tropical Grasslands (23 shared taxa), Tropical Forest (35 shared taxa) and Subtropical Mixed Forest (40 shared taxa). Cluster analysis based on UPGMA (cophenetic correlation, 0.8952) is visualized in Figure 3. The first group (forests of Atlantic Domain) is composed of the Tropical Forest, Subtropical Seasonal Forest and Subtropical Mixed Forest, the second group (grasslands of the Atlantic Domain) of the Subtropical Highland Grasslands (Campos de Cima da Serra) and the High Altitude Tropical Grasslands, and the third group (grasslands and savannas of the Pampas Domain) of the Low Altitude Temperate Grasslands plus the Subtropical Scrub. The Tropical Coastal Scrub (coastal vegetation of Atlantic Domain) and the Tropical Savanna (Cerrado Domain) did not group and remained separated.

The TWINSPLAN analysis shows similar results where, in the first partition, the Low Altitude Temperate Grasslands and the Subtropical Scrub are separated with an eigenvalue of 0.695 and 19 taxa as indicators. The second partition separates the Tropical Forest, Subtropical Seasonal Forest, Subtropical Highland Grasslands, Subtropical Mixed Forest and Tropical Coastal Scrub from the High Altitude Tropical Grasslands plus the Tropical Savanna, with an eigenvalue of 0.652 and 165 positive preferential species. Finally, the Subtropical Highland Grasslands emerged from the remaining vegetation formations with an eigenvalue of 0.525 and 97 taxa as positive preferentials.

Figure 2B shows a Venn diagram of the four groups clustered in the previous analysis, which are also represented in Figure 4. No southern Brazilian endemic taxa co-occur in all four groups and only two species occur in three different groups: *Mimosa intricata* Benth. (Forests + Pampas + HAG) and *Galianthe verbenoides* (Cham. & Schltld.) Griseb. (Pampas + HAG + TRS). The High Altitude Grasslands (HTG + SHG) share endemic taxa from southern Brazil with all three other groups, being weakly related to both the Pampas and Tropical Savannas (12 and 11 shared taxa, respectively), and sharing more exclusive species with the Forests (76 shared taxa).

## DISCUSSION

A previous study concerning endemic plants from southern Brazil included an analysis of the distribution patterns by Marchioretto & Siqueira (1998) of endemic plants from Rio Grande do Sul state, in which they listed 65 eudicotyledons within different biomes and five endemic taxa from the Subtropical Highland Grasslands. Later, the total plant diversity from the Subtropical Highland Grasslands was estimated to be 1161 plant taxa (including 107 endemic taxa; 9.21%) (Boldrini *et al.*, 2009). In the present study, we demonstrate a remarkably higher level of endemism in the Subtropical Highland Grasslands (25.31%; 296 taxa). This may even exceed the endemism in the High Altitude Tropical Grasslands further north in Brazil, where 11% of vascular plant species are endemic to Itatiaia (part of the Serra da Mantiqueira range) in south-east Brazil (Martinelli, Bandeira & Bragança, 1989) and 17–31% of species are endemic in the flora of the High Altitude Tropical Grasslands as a whole (Safford, 1999). Most of the genera sampled by Safford (2007) for the south-east Brazilian High Altitude Tropical Grasslands are the same as those found in southern Brazil, but many exclusive species indicate the distinction between them.

The Subtropical Highland Grasslands contain a marked diversity of endemic flowering plants, especially at the eastern edge of the plateau of the highlands, e.g. from Campos dos Padres and Serra do Corvo Branco in Santa Catarina state to Serra da Rocinha and Cambará do Sul in Rio Grande do Sul State. Although these grasslands are within the Atlantic Forest Domain (Oliveira-Filho & Fontes, 2000), the results here suggest an endemism centre distinct from the High Altitude Tropical Grasslands in the Serra do Mar range, in the north-east of Santa Catarina and the east of Paraná. The Subtropical Highland Grasslands contain a high level of endemic plant taxa, which should be considered as particularly important for conservation approaches and future

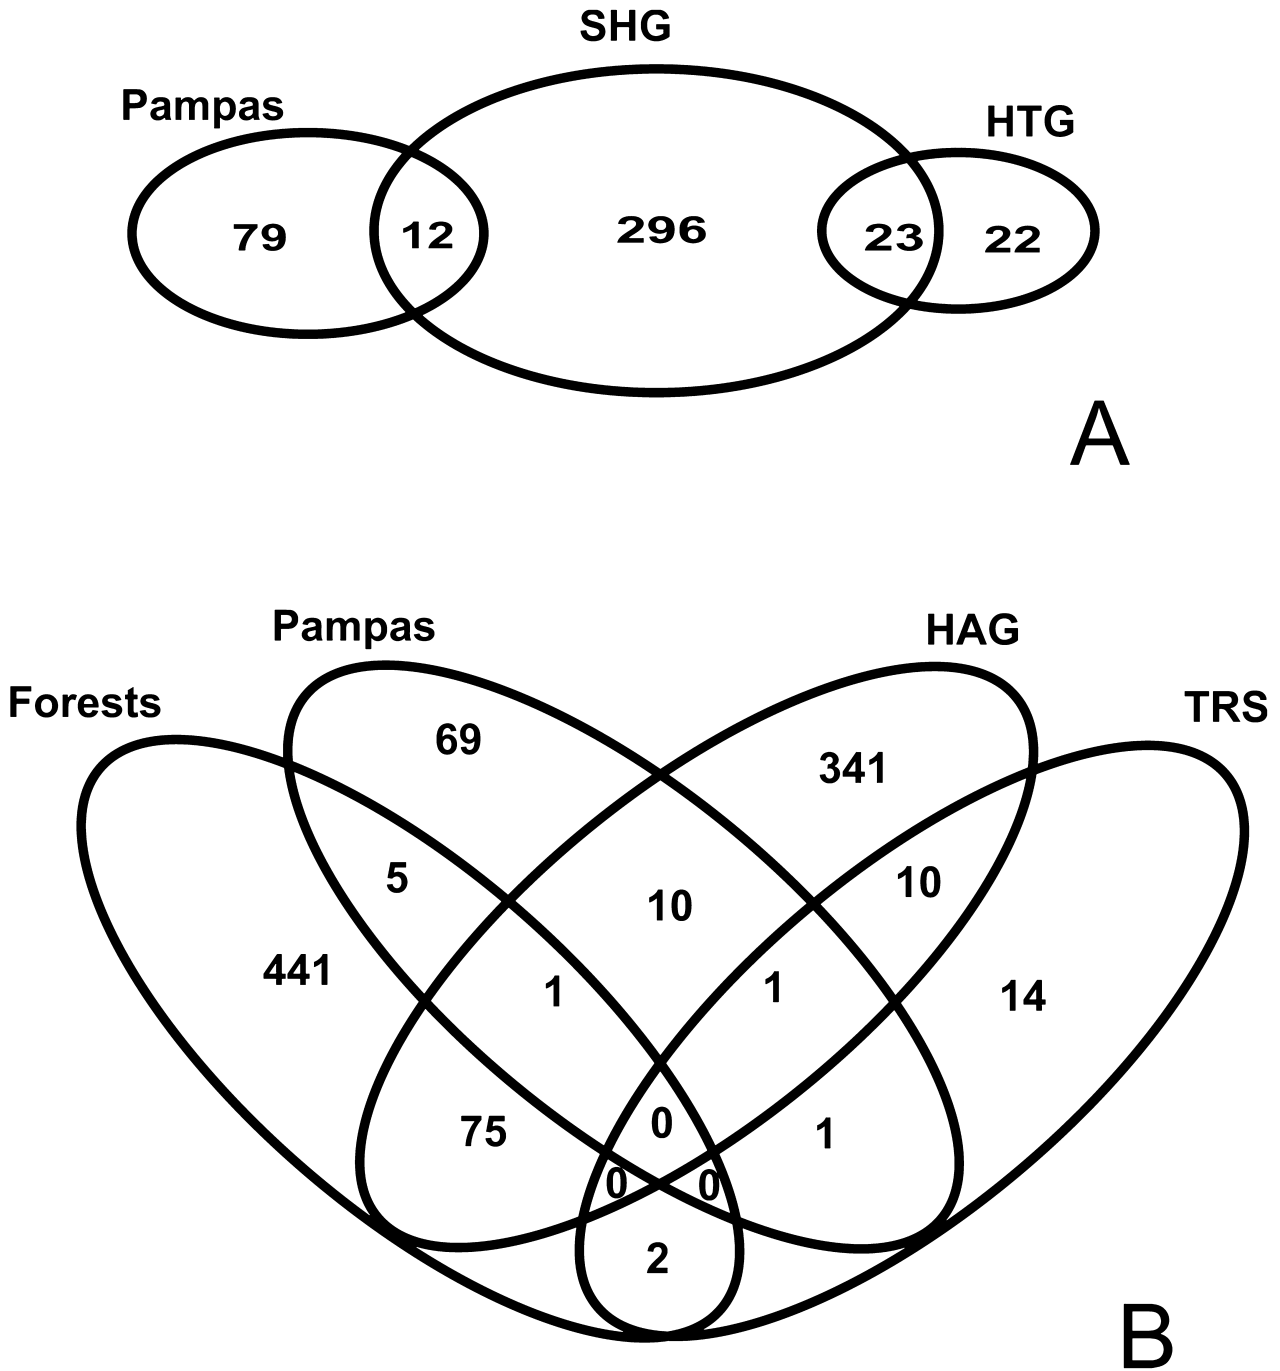

**Figure 2.** A, Exclusive and shared southern Brazilian endemic taxa between the grassland formations. B, Distribution of exclusive and shared southern Brazilian endemic taxa, considering the four major vegetation clusters from southern Brazil. Forests, Tropical Forest, Subtropical Seasonal Forest, Subtropical Mixed Forest and Tropical Coastal Scrubs; HAG, High Altitude Grasslands (SHG plus HTG); HTG, High Altitude Tropical Grasslands; Pampas, Low Altitude Temperate Grasslands and Temperate Shrubland; SHG, Subtropical Highland Grasslands (Campos de Cima da Serra); TRS, Tropical Savanna.

**Table 2.** Endemic flowering plants from the Subtropical Highland Grasslands, southern Brazil

|                  |                                                                            |
|------------------|----------------------------------------------------------------------------|
| Alstroemeriaceae | <i>Alstroemeria malmeana</i> Kraenzl.                                      |
| Amaryllidaceae   | <i>Hippeastrum santacatarina</i> (Traub) Dutilh                            |
|                  | <i>Nothoscordum aparadense</i> Ravenna                                     |
|                  | <i>Nothoscordum cambareense</i> Ravenna                                    |
|                  | <i>Nothoscordum capivarinum</i> Ravenna                                    |
|                  | <i>Nothoscordum catharinense</i> Ravenna                                   |
|                  | <i>Nothoscordum collinum</i> Ravenna                                       |
|                  | <i>Nothoscordum curvipes</i> Ravenna                                       |
|                  | <i>Nothoscordum exile</i> Ravenna                                          |
|                  | <i>Nothoscordum gracilipes</i> Ravenna                                     |
|                  | <i>Nothoscordum leptogynum</i> Ravenna                                     |
|                  | <i>Nothoscordum luteomajus</i> Ravenna                                     |
|                  | <i>Nothoscordum nutans</i> Ravenna                                         |
|                  | <i>Nothoscordum stenandrum</i> Ravenna                                     |
|                  | <i>Nothoscordum tibaginum</i> Ravenna                                      |
|                  | <i>Nothoscordum uruguaiantum</i> Ravenna                                   |
|                  | <i>Zephyranthes lagesiana</i> Ravenna                                      |
|                  | <i>Zephyranthes paranaensis</i> Ravenna                                    |
| Anacardiaceae    | <i>Schinus spinosus</i> Engl.                                              |
| Apiaceae         | <i>Eryngium corallinum</i> Mathias & Constance                             |
|                  | <i>Eryngium falcifolium</i> Irgang                                         |
|                  | <i>Eryngium ramboanum</i> Mathias & Constance                              |
|                  | <i>Eryngium smithii</i> Mathias & Constance                                |
|                  | <i>Eryngium urbanianum</i> H.Wolff                                         |
|                  | <i>Eryngium zosterifolium</i> H.Wolff                                      |
|                  | <i>Lilaeopsis tenuis</i> A.W.Hill                                          |
| Apocynaceae      | <i>Oxypetalum coalitum</i> E.Fourn.                                        |
|                  | <i>Oxypetalum malmei</i> Hoehne                                            |
|                  | <i>Oxypetalum morilloanum</i> Fontella                                     |
| Asteraceae       | <i>Achyrocline luisiana</i> Deble                                          |
|                  | <i>Austroeupatorium rosmarinaceum</i> (Cabrera & Vittet) R.M.King & H.Rob. |
|                  | <i>Baccharis apicifoliola</i> A.A.Schneid. & Boldrini                      |
|                  | <i>Baccharis chionolaenoides</i> D.B.Falkenb. & Deble                      |
|                  | <i>Baccharis deblei</i> A.S.Oliveira & Marchiori                           |
|                  | <i>Baccharis hypericifolia</i> Baker                                       |
|                  | <i>Baccharis megapotamica</i> var. <i>weirii</i> (Baker) G.M.Barroso       |
|                  | <i>Baccharis pseudovillosa</i> Teodoro & Vidal                             |
|                  | <i>Baccharis scabrifolia</i> G.Heiden                                      |
|                  | <i>Baccharis scopulorum</i> A.A.Schneid. & G.Heiden                        |
|                  | <i>Baccharis trilobata</i> A.S.Oliveira & Marchiori                        |
|                  | <i>Baccharis uleana</i> Malag.                                             |
|                  | <i>Baccharis wagenitzii</i> (F.H.Hellw.) Joch.Müll.                        |
|                  | <i>Barrosoa ramboi</i> (Cabrera) R.M.King & H.Rob.                         |
|                  | <i>Calea ilienii</i> Malme                                                 |
|                  | <i>Calea monocephala</i> Dusén                                             |
|                  | <i>Carelia ramboi</i> Cabrera                                              |
|                  | <i>Chromolaena kleinii</i> (Cabrera) R.M.King & H.Rob.                     |
|                  | <i>Chromolaena oinopolepis</i> (Malme) R.M.King & H.Rob.                   |
|                  | <i>Chromolaena palmaris</i> (Sch.Bip. ex Baker) R.M.King & H.Rob.          |
|                  | <i>Chromolaena umbelliformis</i> (Dusén ex Malme) R.M.King & H.Rob.        |
|                  | <i>Chrysoleaena nicolackii</i> H.Rob.                                      |
|                  | <i>Conyza reitziana</i> Cabrera                                            |
|                  | <i>Dendrophorbium subnemoralis</i> (Dusén) A.M.Teles                       |
|                  | <i>Gochnatia argyrea</i> (Dusén ex Malme) Cabrera                          |
|                  | <i>Hatschbachiella polyclada</i> (Dusén ex Malme) R.M.King & H.Rob.        |
|                  | <i>Heterocondylus reitzii</i> R.M.King & H.Rob.                            |

Table 2. *Continued*

|                 |                                                                                    |
|-----------------|------------------------------------------------------------------------------------|
|                 | <i>Hieracium commersonii</i> var. <i>megapotamicum</i> Malme                       |
|                 | <i>Hieracium ignatianum</i> Baker                                                  |
|                 | <i>Hieracium urvillei</i> Sch.Bip.                                                 |
|                 | <i>Holocheilus monocephalus</i> Mondin                                             |
|                 | <i>Hysterionica pinnatiloba</i> Matzenb. & Sobral                                  |
|                 | <i>Hysterionica pinnatisecta</i> Matzenb. & Sobral                                 |
|                 | <i>Lepidaploa pseudomuricata</i> H.Rob.                                            |
|                 | <i>Leptostelma catharinensis</i> (Cabrera) A.M.Teles & Sobral                      |
|                 | <i>Lessingianthus reitzianus</i> (Cabrera) H.Rob.                                  |
|                 | <i>Malmeanthus catharinensis</i> R.M.King & H.Rob.                                 |
|                 | <i>Mikania nana</i> W.C.Holmes                                                     |
|                 | <i>Neocabreria catharinensis</i> (Cabrera) R.M.King & H.Rob.                       |
|                 | <i>Noticastrum decumbens</i> (Baker) Cuatrec.                                      |
|                 | <i>Panphalea araucariophila</i> Cabrera                                            |
|                 | <i>Panphalea ramboi</i> Cabrera                                                    |
|                 | <i>Panphalea smithii</i> Cabrera                                                   |
|                 | <i>Perezia catharinensis</i> Cabrera                                               |
|                 | <i>Perezia eryngioides</i> (Cabrera) Crisci & Martic.                              |
|                 | <i>Senecio conyzifolius</i> Baker                                                  |
|                 | <i>Senecio promatensis</i> Matzenb.                                                |
|                 | <i>Senecio ramboanus</i> Cabrera                                                   |
|                 | <i>Senecio rauchii</i> Matzenb.                                                    |
|                 | <i>Stevia tenuis</i> Hook. & Arn.                                                  |
|                 | <i>Vernonanthura perangusta</i> (Malme) A.J.Veja & Dematt.                         |
|                 | <i>Vernonanthura rigiophylla</i> (Kuntze) H.Rob.                                   |
|                 | <i>Vernonia viminea</i> Ekman ex Malme                                             |
|                 | <i>Viguiera meridionalis</i> Magenta                                               |
|                 | <i>Viguiera paranensis</i> (Malme) J.U.Santos                                      |
|                 | <i>Viguiera santacatarinense</i> (H.Rob. & A.J.Moore) A.A.Sáenz                    |
| Bromeliaceae    | <i>Dyckia cabrerai</i> L.B.Sm. & Reitz                                             |
|                 | <i>Dyckia crocea</i> L.B.Sm.                                                       |
|                 | <i>Dyckia dusenii</i> L.B.Sm.                                                      |
|                 | <i>Dyckia fosteriana</i> var. <i>robustior</i> L.B.Sm.                             |
|                 | <i>Dyckia frigida</i> Hook.f.                                                      |
|                 | <i>Dyckia ibiramensis</i> Reitz                                                    |
|                 | <i>Dyckia irmgardiae</i> L.B.Sm.                                                   |
|                 | <i>Dyckia remotiflora</i> var. <i>angustior</i> L.B.Sm.                            |
| Cactaceae       | <i>Frailea curvispina</i> Buining & Brederoo                                       |
|                 | <i>Parodia carambeiensis</i> (Buining & Brederoo) Hofacker                         |
|                 | <i>Parodia haselbergii</i> subsp. <i>graessneri</i> (K.Schum) Hofacker & P.J.Braun |
|                 | <i>Parodia haselbergii</i> (Haage ex Rümpler) F.H.Brandt subsp. <i>haselbergii</i> |
|                 | <i>Parodia rechensis</i> (Buining) F.H.Brandt                                      |
| Campanulaceae   | <i>Lobelia paranaensis</i> R.Braga                                                 |
|                 | <i>Siphocampylus densidentatus</i> E.Wimm.                                         |
| Caprifoliaceae  | <i>Valeriana bornmuelleri</i> Pilg.                                                |
|                 | <i>Valeriana chamaedryfolia</i> Cham. & Schltldl.                                  |
|                 | <i>Valeriana eichleriana</i> (Muell.) Graebn.                                      |
|                 | <i>Valeriana glechomifolia</i> F.G.Mey.                                            |
|                 | <i>Valeriana muelleri</i> Graebn.                                                  |
| Caryophyllaceae | <i>Paronychia revoluta</i> C.E.Carneiro & Furlan                                   |
| Cyperaceae      | <i>Eleocharis kleinii</i> Barros                                                   |
|                 | <i>Rhynchospora pseudomacrostachya</i> Gerry Moore, Guagl. & Zartman               |
|                 | <i>Rhynchospora smithii</i> W.W.Thomas                                             |
|                 | <i>Schoenus lymansmithii</i> M.T.Strong                                            |
| Ericaceae       | <i>Gaultheria ulei</i> Sleumer                                                     |
|                 | <i>Gaultheria corvensis</i> (R.R.Silva & Cervi) G.O.Romão & Kin.-Gouv.             |



**Table 2.** *Continued*

|                |                                                                                                                                                                                                                                                                                                                                                                                                                                                                                                                                                                                                                                                                                                                                                                                                                                                                                                                                                                                                                            |
|----------------|----------------------------------------------------------------------------------------------------------------------------------------------------------------------------------------------------------------------------------------------------------------------------------------------------------------------------------------------------------------------------------------------------------------------------------------------------------------------------------------------------------------------------------------------------------------------------------------------------------------------------------------------------------------------------------------------------------------------------------------------------------------------------------------------------------------------------------------------------------------------------------------------------------------------------------------------------------------------------------------------------------------------------|
| Eriocaulaceae  | <i>Eriocaulon magnificum</i> Ruhland var. <i>magnificum</i><br><i>Eriocaulon ulaei</i> var. <i>radiosum</i> Ruhland<br><i>Eriocaulon ulaei</i> Ruhland var. <i>ulaei</i><br><i>Paepalanthus albovaginatus</i> Silveira var. <i>albovaginatus</i><br><i>Paepalanthus albovaginatus</i> var. <i>albobracteatus</i> Tissot-Sq.<br><i>Paepalanthus albovaginatus</i> var. <i>fuscobracteatus</i> Tissot-Sq.<br><i>Paepalanthus bellus</i> Moldenke<br><i>Paepalanthus catharinae</i> Ruhland var. <i>catharinae</i><br><i>Paepalanthus leiseringii</i> var. <i>kleinii</i> Moldenke & L.B.Sm.<br><i>Paepalanthus tessmannii</i> Moldenke<br><i>Syngonanthus caulescens</i> var. <i>proliferus</i> Moldenke                                                                                                                                                                                                                                                                                                                     |
| Escalloniaceae | <i>Escallonia ledifolia</i> Sleumer                                                                                                                                                                                                                                                                                                                                                                                                                                                                                                                                                                                                                                                                                                                                                                                                                                                                                                                                                                                        |
| Euphorbiaceae  | <i>Acalypha apetiolata</i> Allem & Waechter<br><i>Bernardia alarici</i> Allem & Irgang<br><i>Bernardia flexuosa</i> Pax & K.Hoffm.<br><i>Bernardia geniculata</i> Allem & Waechter<br><i>Bernardia hagelundii</i> Allem & Irgang<br><i>Chiropetalum foliosum</i> (Müll.Arg.) Pax & K.Hoffm.<br><i>Chiropetalum molle</i> (Baill.) Pax & K.Hoffm.<br><i>Chiropetalum phalacradenium</i> (J.W.Ingram) L.B.Sm. & Downs<br><i>Croton calyciglandulosus</i> Allem<br><i>Croton catharinensis</i> L.B.Sm. & Downs<br><i>Croton confinis</i> L.B.Sm. & Downs<br><i>Croton dusenii</i> Croizat<br><i>Croton ericoideus</i> Baill.<br><i>Croton helichrysum</i> Baill.<br><i>Croton ichthygaster</i> L.B.Sm. & Downs<br><i>Croton kleinii</i> L.B.Sm. & Downs<br><i>Croton leptophyllus</i> Müll.Arg.<br><i>Croton myrianthus</i> Müll.Arg.<br><i>Croton patrum</i> L.B.Sm. & Downs<br><i>Croton polygonoides</i> L.B.Sm. & Downs<br><i>Croton quintasii</i> Allem<br><i>Croton ramboi</i> Allem<br><i>Croton thymelinus</i> Baill. |
| Fabaceae       | <i>Adesmia araujoii</i> Burkart<br><i>Adesmia arillata</i> Miotto<br><i>Adesmia ciliata</i> Vogel<br><i>Adesmia paranensis</i> Burkart<br><i>Adesmia psoraleoides</i> Vogel<br><i>Adesmia reitziana</i> Burkart<br><i>Adesmia rocinhensis</i> Burkart<br><i>Adesmia sulina</i> Miotto<br><i>Adesmia tristis</i> Vogel<br><i>Adesmia vallsii</i> Miotto<br><i>Crotalaria hilariana</i> Benth.<br><i>Desmodium craspediferum</i> A.M.G.Azevedo & Abruzzi de Oliveira<br><i>Lupinus paranensis</i> C.P.Sm.<br><i>Lupinus reitzii</i> Burkart ex. M.Pinheiro & Miotto<br><i>Lupinus rubriflorus</i> Planchuelo<br><i>Mimosa bathyrrhena</i> Barneby<br><i>Mimosa chartostegia</i> Barneby<br><i>Mimosa dolens</i> var. <i>pangloea</i> Barneby<br><i>Mimosa dryandroides</i> var. <i>extratropica</i> Barneby<br><i>Mimosa eriocarpa</i> Benth.<br><i>Mimosa glabra</i> Benth.                                                                                                                                                 |

Table 2. Continued

|                 |                                                                             |
|-----------------|-----------------------------------------------------------------------------|
|                 | <i>Mimosa hatschbachii</i> Barneby                                          |
|                 | <i>Mimosa involucrata</i> Benth.                                            |
|                 | <i>Mimosa kuhnisteroides</i> Barneby                                        |
|                 | <i>Mimosa macrocalyx</i> var. <i>pectinata</i> Burkart                      |
|                 | <i>Mimosa oblonga</i> var. <i>pinetorum</i> Barneby                         |
|                 | <i>Mimosa pseudolepidota</i> (Burkart) Barneby                              |
|                 | <i>Mimosa regnellii</i> var. <i>exuta</i> Barneby                           |
|                 | <i>Mimosa regnellii</i> var. <i>grossiseta</i> Barneby                      |
|                 | <i>Vicia graminea</i> var. <i>nigricarpa</i> N.R.Bastos & Miotto            |
|                 | <i>Vicia hatschbachii</i> Burkart ex Vanni & D.B.Kurtz                      |
| Gesneriaceae    | <i>Sinningia leopoldii</i> (Scheidw. ex Planch.) Chautems                   |
| Hypericaceae    | <i>Hypericum cordatum</i> subsp. <i>kleinii</i> N.Robson                    |
| Iridaceae       | <i>Calydorea basaltica</i> Ravenna                                          |
|                 | <i>Calydorea crocoides</i> Ravenna                                          |
|                 | <i>Cypella aquatilis</i> Ravenna                                            |
|                 | <i>Sisyrinchium bromelioides</i> R.C.Foster subsp. <i>bromelioides</i>      |
|                 | <i>Sisyrinchium coalitum</i> Ravenna                                        |
|                 | <i>Sisyrinchium decumbens</i> Ravenna                                       |
|                 | <i>Sisyrinchium densiflorum</i> Ravenna                                     |
|                 | <i>Sisyrinchium rambonis</i> R.C.Foster                                     |
| Lamiaceae       | <i>Cunila fasciculata</i> Benth.                                            |
|                 | <i>Cunila platyphylla</i> Epling                                            |
|                 | <i>Cunila tenuifolia</i> Epling                                             |
|                 | <i>Glechon elliptica</i> C.Pereira & Hatschbach                             |
|                 | <i>Hedeoma polygalifolia</i> Benth.                                         |
|                 | <i>Hesperozygis kleinii</i> Epling & Játiva                                 |
|                 | <i>Hesperozygis rhododon</i> Epling                                         |
|                 | <i>Hesperozygis spathulata</i> Epling                                       |
|                 | <i>Hyptis apertiflora</i> Epling                                            |
|                 | <i>Peltodon rugosus</i> Tolm.                                               |
|                 | <i>Rhabdocalon erythrostachys</i> Epling                                    |
|                 | <i>Salvia congestiflora</i> Epling                                          |
|                 | <i>Salvia cordata</i> Benth.                                                |
|                 | <i>Salvia scoparia</i> Epling                                               |
| Linaceae        | <i>Linum smithii</i> Mildner                                                |
| Lythraceae      | <i>Cuphea hatschbachii</i> Lourteig                                         |
|                 | <i>Cuphea iguazuensis</i> Lourteig                                          |
| Malvaceae       | <i>Modiolastrum palustre</i> (Ekman) Krapov.                                |
|                 | <i>Pavonia commutata</i> Garcke                                             |
|                 | <i>Pavonia ramboi</i> Krapov. & Cristóbal                                   |
|                 | <i>Pavonia reitzii</i> Krapov. & Cristóbal                                  |
|                 | <i>Pavonia renifolia</i> Krapov.                                            |
| Melastomataceae | <i>Leandra camporum</i> Brade                                               |
|                 | <i>Leandra dusenii</i> Cogn.                                                |
|                 | <i>Leandra luctatoris</i> Wurdack                                           |
|                 | <i>Tibouchina kleinii</i> Wurdack                                           |
| Myrtaceae       | <i>Psidium reptans</i> (D.Legrand) Soares-Silva & Proença                   |
| Onagraceae      | <i>Fuchsia hatschbachii</i> P.E.Berry                                       |
| Orchidaceae     | <i>Brachystele bicrinita</i> Szlach.                                        |
|                 | <i>Cyclopogon vittatus</i> Dutra ex Pabst                                   |
|                 | <i>Cyrtopodium brandonianum</i> subsp. <i>lageanum</i> J.A.N.Bat. & Bianch. |
|                 | <i>Cyrtopodium kleinii</i> J.A.N.Bat. & Bianch.                             |
|                 | <i>Habenaria dutraei</i> Schltr.                                            |
|                 | <i>Habenaria schnittmeyeri</i> Schltr.                                      |
|                 | <i>Habenaria ulaei</i> Cogn.                                                |
|                 | <i>Pelexia burgeri</i> Schltr.                                              |

**Table 2.** *Continued*

|                  |                                                               |
|------------------|---------------------------------------------------------------|
|                  | <i>Pelexia robusta</i> (Kraenzl.) Schltr.                     |
|                  | <i>Pelexia tenuior</i> Schltr.                                |
|                  | <i>Sarcoglottis glaucescens</i> Schltr.                       |
|                  | <i>Sarcoglottis juergensii</i> Schltr.                        |
|                  | <i>Stigmatosema garayana</i> Szlach.                          |
|                  | <i>Stigmatosema hatschbachii</i> (Pabst) Garay                |
|                  | <i>Veyretia undulata</i> Szlach.                              |
| Oxalidaceae      | <i>Oxalis bisecta</i> Norlind                                 |
|                  | <i>Oxalis praetexta</i> Progel                                |
| Plantaginaceae   | <i>Mecardonia pubescens</i> Rossow                            |
|                  | <i>Plantago turficola</i> Rahn                                |
|                  | <i>Scoparia pinnatifida</i> Cham.                             |
| Poaceae          | <i>Agrostis ramboi</i> Parodi                                 |
|                  | <i>Aulonemia ulei</i> (Hack.) McClure & L.B.Sm.               |
|                  | <i>Bothriochloa velutina</i> M.Marchi & Longhi-Wagner         |
|                  | <i>Briza brachychaete</i> Ekman                               |
|                  | <i>Briza scabra</i> (Nees ex Steud.) Ekman                    |
|                  | <i>Calamagrostis longiaristata</i> var. <i>minor</i> Kämpf    |
|                  | <i>Calamagrostis reitzii</i> Swallen                          |
|                  | <i>Chusquea hatschbachii</i> L.G.Clark & Blong                |
|                  | <i>Chusquea windischii</i> L.G.Clark                          |
|                  | <i>Digitaria purpurea</i> Swallen                             |
|                  | <i>Eustachys paranensis</i> A.M.Molina                        |
|                  | <i>Melica spartinoides</i> L.B.Sm.                            |
|                  | <i>Panicum magnispicula</i> Zuloaga, Morrone & Valls          |
|                  | <i>Paspalum barretoi</i> Canto-Dorow, Valls & Longhi-Wagner   |
|                  | <i>Paspalum ramboi</i> I.L.Barreto                            |
|                  | <i>Paspalum redondense</i> Swallen                            |
|                  | <i>Piptochaetium alpinum</i> L.B.Sm.                          |
|                  | <i>Piptochaetium palustre</i> Muj.-Sall. & Longhi-Wagner      |
|                  | <i>Poa reitzii</i> Swallen                                    |
|                  | <i>Poa umbrosa</i> Trin.                                      |
|                  | <i>Stipa brasiliensis</i> A.Zanin & Longhi-Wagner             |
|                  | <i>Stipa planaltina</i> A.Zanin & Longhi-Wagner               |
|                  | <i>Stipa rhizomata</i> A.Zanin & Longhi-Wagner                |
|                  | <i>Stipa vallsii</i> A.Zanin & Longhi-Wagner                  |
|                  | <i>Thrasypopsis juergensii</i> (Hack.) Soderstr. & A.G. Burm. |
|                  | <i>Trisetum juergensii</i> Hack.                              |
| Polygalaceae     | <i>Polygala altomontana</i> Lüdtkke, Boldrini & Miotto        |
|                  | <i>Polygala densiracemosa</i> Lüdtkke & Miotto                |
| Polygonaceae     | <i>Rumex sellowianus</i> Rech.f.                              |
| Portulacaceae    | <i>Portulaca diegoi</i> Mattos                                |
|                  | <i>Portulaca hatschbachii</i> D.Legrand                       |
| Rubiaceae        | <i>Galianthe elegans</i> E.L.Cabral                           |
|                  | <i>Galianthe latistipula</i> E.L.Cabral                       |
|                  | <i>Galianthe reitzii</i> E.L.Cabral                           |
|                  | <i>Galium hatschbachii</i> Dempster                           |
|                  | <i>Galium ramboi</i> Dempster                                 |
|                  | <i>Galium rubidiflorum</i> Dempster                           |
|                  | <i>Galium smithreitzii</i> Dempster                           |
|                  | <i>Oldenlandia dusenii</i> Standl.                            |
| Scrophulariaceae | <i>Buddleja cestriflora</i> Cham.                             |
|                  | <i>Buddleja cuneata</i> Cham.                                 |
|                  | <i>Buddleja hatschbachii</i> E.M.Norman & L.B.Sm.             |
|                  | <i>Buddleja kleinii</i> E.M.Norman & L.B.Sm.                  |
|                  | <i>Buddleja ramboi</i> L.B.Sm.                                |

**Table 2.** *Continued*

|             |                                                                                                                                                                                                                                                                                                                                                                                                                                                                         |
|-------------|-------------------------------------------------------------------------------------------------------------------------------------------------------------------------------------------------------------------------------------------------------------------------------------------------------------------------------------------------------------------------------------------------------------------------------------------------------------------------|
| Solanaceae  | <i>Calibrachoa cordifolia</i> Stehmann & L.W.Aguiar<br><i>Calibrachoa dusenii</i> (R.E.Fr.) Stehmann & Semir<br><i>Calibrachoa sellowiana</i> (Sendtn.) Wijsman<br><i>Calibrachoa sendtneriana</i> (R.E.Fr.) Stehmann & Semir<br><i>Calibrachoa serrulata</i> (L.B.Sm. & Downs) Stehmann & Semir<br><i>Calibrachoa spathulata</i> (L.B.Sm. & Downs) Stehmann & Semir<br><i>Nierembergia hatschbachii</i> A.A.Cocucci & Hunz.<br><i>Petunia saxicola</i> L.B.Sm. & Downs |
| Verbenaceae | <i>Glandularia catharinae</i> (Moldenke) N.O'Leary & P.Peralta<br><i>Glandularia dusenii</i> (Moldenke) N.O'Leary & P.Peralta<br><i>Glandularia hatschbachii</i> (Moldenke) N.O'Leary & P.Peralta<br><i>Lippia paranensis</i> (Moldenke) T.R.S. Silva & Salimena<br><i>Verbena caniuensis</i> Moldenke<br><i>Verbena subpetiolata</i> N.O'Leary                                                                                                                         |
| Xyridaceae  | <i>Xyris dissitifolia</i> Kral & Wand.<br><i>Xyris hatschbachii</i> L.B.Sm. & Downs                                                                                                                                                                                                                                                                                                                                                                                     |

**Table 3.** Comparison between the endemic flora from nine different vegetation formations in southern Brazil

| Vegetation formation | TRF        | SSF           | SHG           | HTG           | SMF           | TCS           | LTG           | TES           | TRS           |
|----------------------|------------|---------------|---------------|---------------|---------------|---------------|---------------|---------------|---------------|
| TRF                  | <b>217</b> | <i>0.0638</i> | <i>0.0488</i> | <i>0.0026</i> | <i>0.1599</i> | <i>0.0667</i> | 0             | 0             | <i>0.0055</i> |
| SSF                  | 25         | <b>39</b>     | <i>0.0229</i> | 0             | <i>0.0901</i> | <i>0.0530</i> | 0             | <i>0.0152</i> | <i>0.0096</i> |
| SHG                  | 35         | 11            | <b>296</b>    | <i>0.0529</i> | <i>0.0729</i> | <i>0.0327</i> | <i>0.0068</i> | <i>0.0218</i> | <i>0.0256</i> |
| HTG                  | 1          | 0             | 23            | <b>22</b>     | 0             | 0             | 0             | 0             | 0             |
| SMF                  | 71         | 21            | 40            | 0             | <b>70</b>     | <i>0.0216</i> | 0             | <i>0.0043</i> | <i>0.0100</i> |
| TCS                  | 25         | 7             | 15            | 0             | 5             | <b>25</b>     | <i>0.0215</i> | 0             | 0             |
| LTG                  | 0          | 0             | 3             | 0             | 0             | 2             | <b>25</b>     | <i>0.0588</i> | 0             |
| TES                  | 0          | 2             | 10            | 0             | 1             | 0             | 5             | <b>39</b>     | <i>0.0247</i> |
| TRS                  | 2          | 1             | 11            | 0             | 2             | 0             | 0             | 2             | <b>13</b>     |

Bold type, number of endemic taxa from southern Brazil by vegetation formation; roman type, number of exclusive taxa from southern Brazil shared by pairs of vegetation formations; italic type, indices of similarity (Sørensen coefficient). HTG, High Altitude Tropical Grasslands; LTG, Low Altitude Temperate Grasslands; SHG, Subtropical Highland Grasslands (Campos de Cima da Serra); SMF, Subtropical Mixed Forest; SSF, Subtropical Seasonal Forest; TCS, Tropical Coastal Scrub; TES, Temperate Shrubland; TRF, Tropical Forest; TRS, Tropical Savanna.

studies concerning patterns of diversification in a subtropical transitional environment.

Safford (2007) listed 928 species of vascular plant for the High Altitude Tropical Grasslands from south-east Brazil, about 21% of which belong to temperate genera. These High Altitude Tropical Grasslands show a genus-level similarity of 41.4% (195 genera shared) with the Subtropical Highland Grasslands, but a species-level similarity of only 9.1% (149 species shared). Overall, the Subtropical Highland Grasslands present a larger number of temperate taxa, probably reflecting their more southerly latitude and subtropical nature, as well as their more proximal position to the probable migration path of temperate taxa into Brazil (Safford, 1999, 2007).

The main groups are the same in the cluster and TWINSpan analyses. The forest biomes group

together in both analyses, as do the two formations that comprise the Pampas. The main differences are related to the Subtropical Highland Grasslands (Campos de Cima da Serra) which remain isolated in the TWINSpan analysis and not related to the High Altitude Tropical Grasslands, which are grouped with the Tropical Savanna. The exclusive and shared taxa between clustered biomes can be observed in Figure 2B.

The Atlantic Forest Domain has a total of 885 endemic taxa in southern Brazil, corresponding to 11.72% of the total endemic plants of the Atlantic Forest hotspot, whereas the Subtropical Highland Grasslands have a total of 296 endemic taxa, corresponding to 4% of the total endemic plants of the Atlantic Forest hotspot. This calls into question policies for conservation that reflect a single, widely

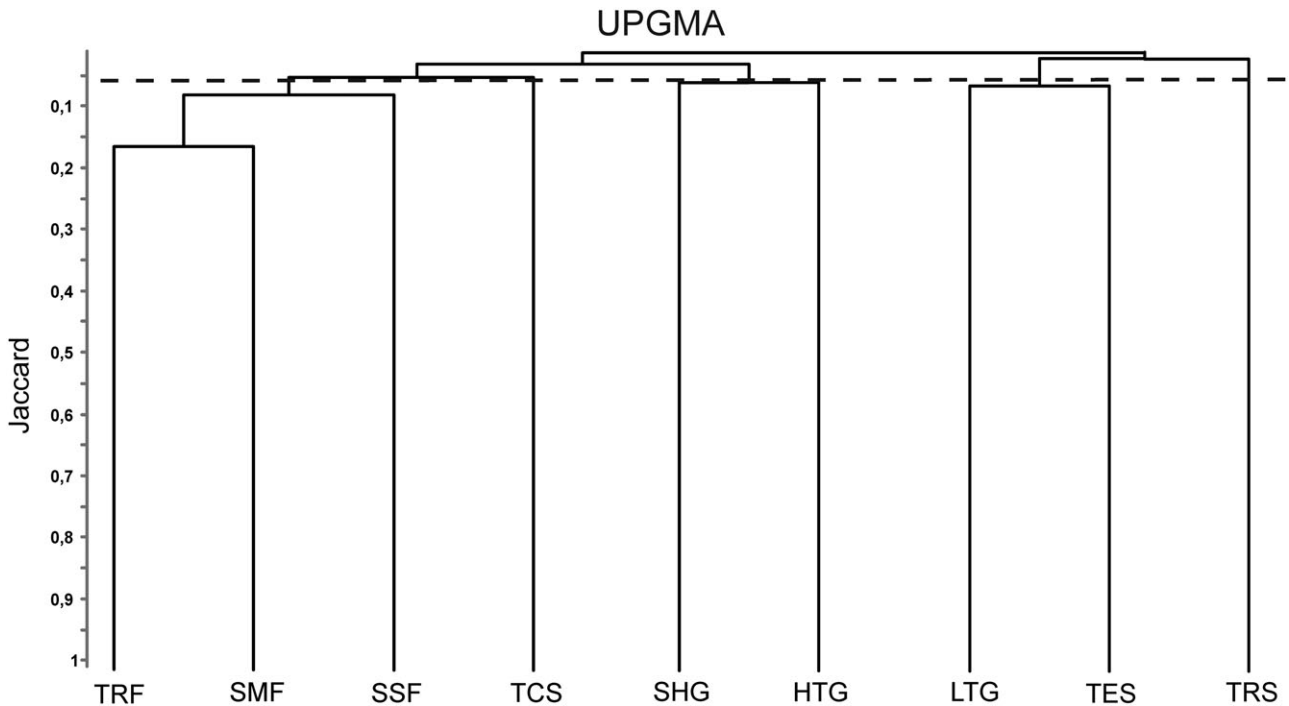

**Figure 3.** Groups formed in the similarity analysis using Jaccard coefficient and Unweighted Pair Group Method with Arithmetic Mean (UPGMA) as a cluster analysis. The broken line indicates the groups formed in the analysis of sharpness. HTG, High Altitude Tropical Grasslands; LTG, Low Altitude Temperate Grasslands; SHG, Subtropical Highland Grasslands (Campos de Cima da Serra); SMF, Subtropical Mixed Forest; SSF, Subtropical Seasonal Forest; TCS, Tropical Coastal Scrub; TES, Temperate Shrubland; TRF, Tropical Forest; TRS, Tropical Savanna.

defined Atlantic Forest Domain (e.g. following the definition of Oliveira-Filho & Fontes, 2000), and suggests that it might be better to consider High Altitude Tropical Grasslands, Subtropical Highland Grasslands, Tropical Forest, Subtropical Seasonal Forest, Subtropical Mixed Forest and Tropical Coastal Scrub separately. In addition, the Subtropical Highland Grasslands are frequently considered together with grasslands from the Pampas (LTG + TES), being collectively termed the ‘Campos Sulinos’. Beyond the physiognomic distinctiveness between the Subtropical Highland Grasslands and Pampas, our results show a strong floristic distinction between them, and they share only 12 taxa. It is clear that, in southern Brazil, different lineages containing endemic taxa are narrowly distributed in different vegetation formations, which are threatened by both human land uses and the increasing predominance of invasive species because of climate change. It is vital, therefore, that conservation policies directed at preserving full plant diversity take these floristic differences into account.

According to the biogeographical classification of South America by Cabrera & Willink (1980), the latitude 30°S is the approximate border between the northern biogeographical provinces Atlántica and

Paranense, part of the Amazonian Domain, essentially tropical and dominated by forest, and the southern provinces Pampeana and Espiñal, which represent an extension of the more continental and xerophytic open vegetations of the Chaco Domain.

Although the flora of the high-altitude grasslands contains a large number of endemic taxa, phyto-geographical connections with similar habitats in the Andes (Rambo, 1951, 1953, 1956; Smith, 1962; Safford, 1999, 2007) and central Brazil (Smith, 1962) are evident. More than one-third of the flora from southern Brazil clearly belong to temperate Austral-Antarctic and Andean lineages (e.g. *Adesmia* DC., *Araucaria* Juss., *Gunnera* L.), which could be evidence that these groups constitute the major focus of secondary radiation of Andean and Austral-Antarctic taxa into eastern South America (Rambo, 1953; Safford, 1999, 2007; Waechter, 2002). At the same time, between one-half and two-thirds of the genera in the Subtropical Highland Grasslands, and in the high-altitude grasslands in south-east Brazil, may have tropical ancestry as congeneric species grow in tropical regions (Safford, 2007).

Phylogenetic studies of biogeography could help to elucidate these deeper phyto-geographical connections. Possible candidate genera are *Lupinus* L.,

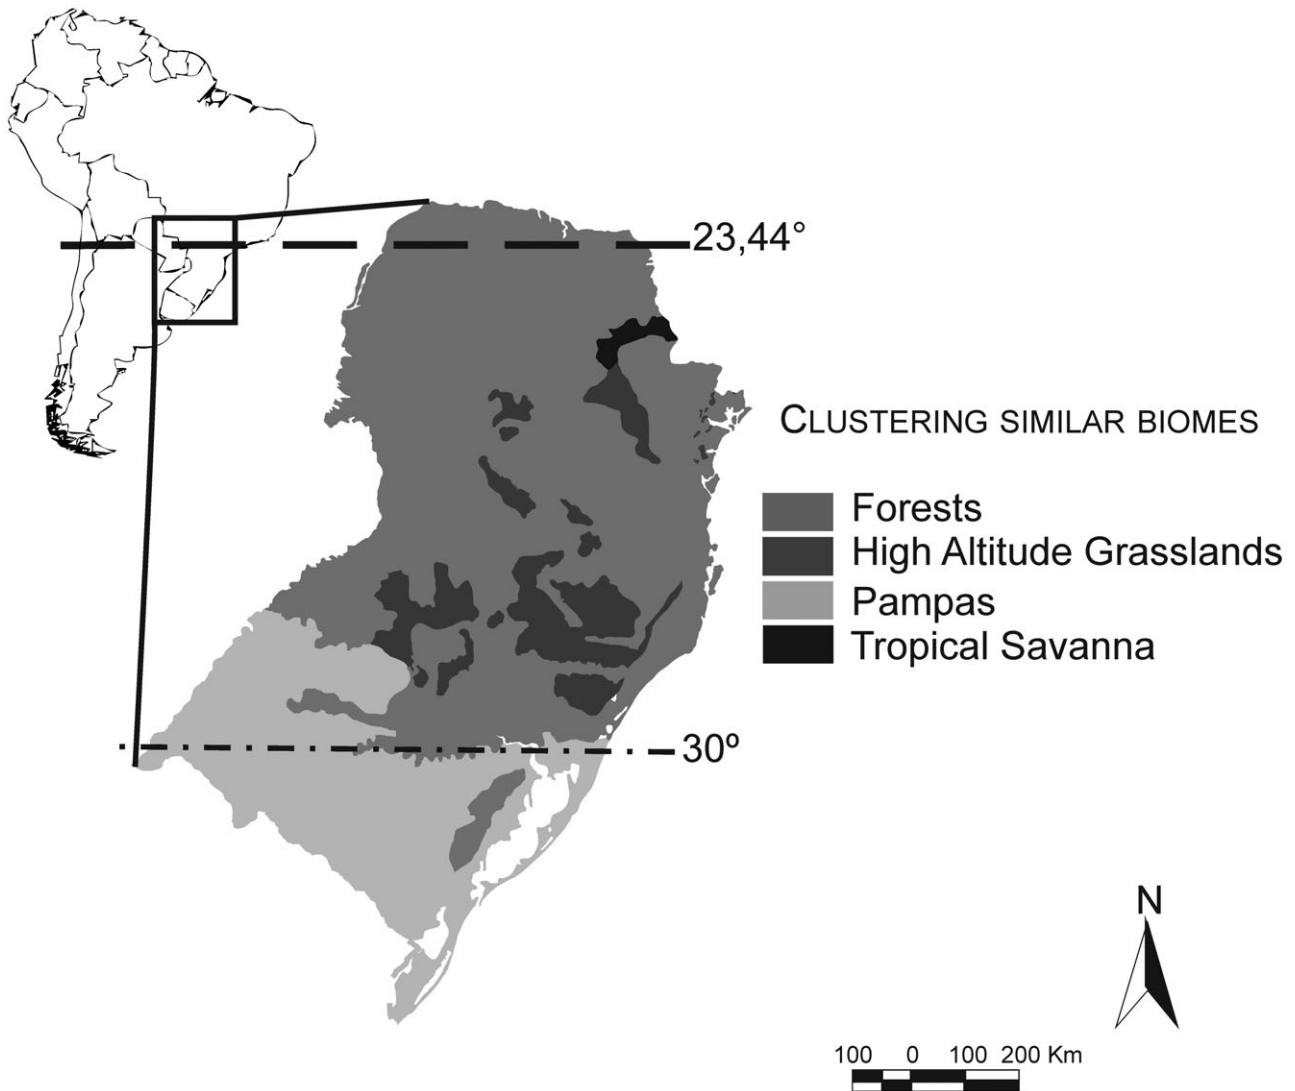

**Figure 4.** Vegetation in southern Brazil grouping the most similar biomes recognized by the cluster analysis of endemic flowering plants.

*Mimosa* and *Baccharis*. In *Lupinus* (Fabaceae), many species have a wide distribution in southern Brazil, occurring from the Pampas to the central Brazilian Cerrado (Hughes & Eastwood, 2006), and some species are endemic to the Subtropical Highland Grasslands. In *Mimosa*, many species from southern Brazil are part of lineages which spread from temperate grasslands in lowlands of Argentina and Uruguay to the Cerrado (Simon *et al.*, 2009). *Baccharis* has numerous endemic taxa from southern Brazil, showing distribution patterns related to both temperate and tropical grasslands from the Pampas, Subtropical Highland Grasslands and High Altitude Tropical Grasslands (Heiden *et al.*, 2007).

Urtubey *et al.* (2010) analysed the diversity patterns of Asteraceae from South America by a panbio-

geographical approach and recognized two main nodes that were interpreted as biotic convergence zones. One is located exactly on the transition tropical/temperate area in the subtropics of Brazil, within the Subtropical Highland Grasslands. In this transitional zone, Safford (1999) suggested that climate fluctuations in the Late Tertiary and Quaternary caused floristic changes in the regions now occupied by the high-altitude grasslands. In cool dry periods, such as Pleistocene glacial times, they were colonized by both cool-temperate Andean and Austral-Antarctic taxa, and xerophilous vegetation from the Brazilian Plateau. In warmer, wetter periods, such as Pleistocene interglacials, more humid-adapted forests would have spread. This picture of alternate dominance of the landscape by forests or grasslands is

supported by palaeobotanical evidence (Smith, 1962; Behling, 2002; Safford, 2007).

According to Safford (1999), the presence of shared genera of highly dispersive groups, such as Asteraceae and Poaceae, between similar habitats can be explained by the ecological compatibility of the available habitat. However, Safford (1999, 2007) agreed with Rambo (1951, 1953) that the presence in southern Brazil of Andean and Austral-Antarctic genera that lack efficient long-distance dispersal mechanisms is best explained by the existence of direct terrestrial connections during past periods of favourable climate at different periods of both the early and late Cenozoic, and probable multiple times within the Pleistocene. This hypothesis could also be tested by phylogenetic analyses of key exemplar taxa.

The diversification of lineages in the Subtropical Highland Grasslands could have been caused by geographical isolation of vegetation in times of varying climate. In warm, wet conditions favouring the expansion of rain forests, representing barriers to the dispersal of grassland species, allopatry in the grasslands could have been a primary mechanism for species differentiation, producing the large numbers of endemic species demonstrated in this study. This hypothesis could be tested by phylogenetic and population genetic studies of genera with numerous endemic species in the Subtropical Highland Grasslands, such as *Adesmia* series *Psoraleoides* Burkart (Miotto & Waechter, 1996).

## CONCLUSIONS

An unexpected diversity of endemic plants is listed for the transitional tropical/temperate vegetation zone in southern Brazil. The Subtropical Highland Grasslands are a distinct vegetation type defined by numerous endemic taxa, and are restricted to isolated patches surrounded by ecologically and floristically distinct formations.

Collectively, the main vegetation types in southern Brazil that are covered in this article harbour 1020 endemic flowering plants, which are distributed within nine biomes. Considering all plant taxa endemic to southern Brazil, few taxa are shared between biomes, but cluster analysis grouped forest biomes (TRF + SSF + SMF + TCS) separate from the High Altitude Grasslands (SHG + HTG) and from the Pampas and Tropical Savanna.

Although the Subtropical Highland Grasslands share taxa with other grasslands and forests, such as the High Altitude Tropical Grasslands and the Low Altitude Temperate Grasslands, they support at least 296 endemic taxa, which is much higher than previous estimates. The transitional character and singularity of the Subtropical Highland Grasslands are

indicated by the fact that they harbour both tropical and temperate plant lineages and show surprisingly low species-level similarities with other southern and south-eastern Brazilian grassland systems. Overall, the large number of endemic taxa in the Subtropical Highland Grasslands suggests that this grassland system has been extant for some time in southern Brazil, and does not simply represent a successional stage of disturbed forest.

## ACKNOWLEDGEMENTS

The authors would like to thank the Coordenação de Aperfeiçoamento de Pessoal de Nível Superior – CAPES, Fundação de Amparo à Pesquisa do Estado de São Paulo – FAPESP (2010/00519-8) and Conselho Nacional de Desenvolvimento Científico e Tecnológico – CNPq, for the provision of grants and post-graduate scholarship support, N. D. dos Santos, J. R. Lima and J. Durigon for comments and suggestions on statistical analysis, and the anonymous referees for their valuable suggestions.

## REFERENCES

- Almeida JA. 2009.** Fatores abióticos. In: Boldrini I, ed. *Biodiversidade dos Campos do Planalto das Araucárias*. Brasília: Ministério do Meio Ambiente, 19–38.
- Alves RJV, Kolbek J. 2010.** Can *campo rupestre* vegetation be floristically delimited based on vascular plant genera? *Plant Ecology* **207**: 67–79.
- Angiosperm Phylogeny Group (APG) III. 2009.** An update of the Angiosperm Phylogeny Group classification for the orders and families of flowering plants: APG III. *Botanical Journal of the Linnean Society* **161**: 105–121.
- Behling H. 2002.** South and southeast Brazilian grasslands during Late Quaternary times: a synthesis. *Palaeogeography, Palaeoclimatology, Palaeoecology* **177**: 19–27.
- Bilencá DN, Miñarro F. 2004.** *Identificación de áreas valiosas de pastizal (AVPs) em las pampas y campos de Argentina, Uruguay y sur de Brasil*. Buenos Aires: Fundación Vida Silvestre Argentina.
- Boldrini II, Eggers L, Mentz LA, Miotto STS, Matzenbacher NI, Longhi-Wagner HM, Trevisan R, Schneider AA, Setúbal RB. 2009.** Flora. In: Boldrini I, ed. *Biodiversidade dos Campos do Planalto das Araucárias*. Brasília: Ministério do Meio Ambiente, 39–94.
- Burman A. 1991.** Saving Brazil's savannas. *New Scientist* **1758**: 30–34.
- Cabrera AL, Willink A. 1980.** *Biogeografía de América Latina*, 2nd edn. Washington DC: Organización de los Estados Americanos.
- CRIA. 2011.** *Centro de Referência em Informação Ambiental*. Available at <http://splink.cria.org.br/>
- Forzza RC, Baumgratz JF, Bicudo CEM, Carvalho Junior A, Costa A, Costa DP, Hopkins MJG, Leitman P, Lohmann LG, Maia LC, Martinelli G, Menezes M,**

- Morim MP, Coelho MN, Peixoto AL, Pirani JR, Prado J, Queiroz LP, Souza VC, Stehmann J, Sylvestre L, Walter BMT, Zappi D, eds. 2010.** *Catálogo das plantas e fungos do Brasil*. 1. ed. v.1 e 2. Rio de Janeiro: Andrea Jakobsson Estúdio & Jardim Botânico do Rio de Janeiro.
- Giulietti AM, Harley RM, Queiroz LP, Wanderley MGL, van den Berg C. 2005.** Biodiversity and conservation of plants in Brazil. *Conservation Biology* **19**: 632–639.
- Heiden G, Iganci JRV, Bobrowski VL, Macias L. 2007.** Biogeografia de *Baccharis* sect. *Caulopterae* (Asteraceae) no Rio Grande do Sul, Brasil. *Rodriguésia* **58**: 787–796.
- Hill MO, Šmilauer P. 2005.** *TWINSPAN for Windows version 2.3*. Huntingdon & Ceske Budejovice: Centre for Ecology and Hydrology & University of South Bohemia.
- Hughes C, Eastwood R. 2006.** Island radiation on a continental scale: exceptional rates of plant diversification after uplift of Andes. *Proceedings of the National Academy of Sciences* **103**: 10 334–10 339.
- International Plant Names Index. 2008.** *The international plant names index*. Available at <http://www.ipni.org>
- Joly CA, Aidar MPM, Klink CA, McGrath DG, Moreira AG, Moutinho P, Nepstad DC, Oliveira AA, Pott A, Rodal MJN, Sampaio EVSB. 1999.** Evolution of the Brazilian phytogeography classification systems: implications for biodiversity conservation. *Ciência e Cultura* **51**: 331–348.
- Leite PF. 2002.** Contribuição ao conhecimento fitoecológico do Sul do Brasil. *Ciência & Ambiente* **24**: 51–73.
- Marchioretto MS, Siqueira JC. 1998.** Espécies endêmicas do Rio Grande do Sul (angiospermas-dicotiledôneas): estudo dos padrões de distribuição geográfica. *Pesquisas Botânica* **48**: 111–144.
- Martinelli G, Bandeira J, Bragança JO. 1989.** *Campos de altitude*. Rio de Janeiro: Index.
- Miotto STS, Waechter JL. 1996.** Considerações fitogeográficas sobre o gênero *Adesmia* no Brasil. *Boletín de la Sociedad Argentina de Botánica* **32**: 59–66.
- Oliveira-Filho AT, Fontes MAL. 2000.** Patterns of floristic differentiation among Atlantic Forests in Southeastern Brazil and the influence of climate. *Biotropica* **32**: 793–810.
- Overbeck GE, Müller SC, Fidelis A, Pfadenhauer J, Pillar VD, Blanco CC, Boldrini II, Both R, Forneck ED. 2007.** Brazil's neglected biome: the South Brazilian Campos. *Perspectives in Plant Ecology, Evolution and Systematics* **9**: 101–116.
- Peel MC, Finlayson BL, McMahon TA. 2007.** Updated world map of the Köppen-Geiger climate classification. *Hydrology and Earth System Sciences* **11**: 1633–1644.
- Pillar VP. 1999.** How sharp are classifications? *Ecology* **80**: 2508–2516.
- Pillar VP. 2006.** *Multivariate exploratory analysis, randomization testing and bootstrap resampling*, version 2.4.2. Porto Alegre: Departamento de Ecologia UFRGS.
- Rambo B. 1951.** O elemento andino no pinhal rio-grandense. *Anais Botânicos do Herbário Barbosa Rodrigues* **3**: 7–39.
- Rambo B. 1953.** História da flora do planalto riograndense. *Anais Botânicos do Herbário Barbosa Rodrigues* **5**: 185–232.
- Rambo B. 1956.** A flora fanerogâmica dos Aparados da Serra. *Sellowia* **7**: 235–298.
- Safford HD. 1999.** Brazilian páramos I. Introduction to the physical environment and vegetation of the campos de altitude. *Journal of Biogeography* **26**: 693–712.
- Safford HD. 2007.** Brazilian páramos IV. Phytogeography of the campos de altitude. *Journal of Biogeography* **34**: 1701–1722.
- Shepherd GJ. 2010.** *Fitopac*, version 2.1.2.85. Campinas: Universidade Estadual de Campinas, Departamento de Botânica.
- Simon MF, Grether R, Queiroz LP, Skemae C, Pennington RT, Hughes CE. 2009.** Recent assembly of the cerrado, a neotropical plant diversity hotspot, by *in situ* evolution of adaptations to fire. *Proceedings of the National Academy of Sciences* **106**: 20 359–20 364.
- Smith LB. 1962.** Origins of the flora of southern Brazil. *Contributions of the US National Herbarium* **35**: 215–249.
- Stehmann JR, Forzza RC, Salino A, Sobral M, Costa DP, Kamino LHY. 2009.** *Plantas da Floresta Atlântica*. Rio de Janeiro: Jardim Botânico do Rio de Janeiro.
- Thiers B. 2010.** *Index herbariorum: a global directory of public herbaria and associated staff*. New York: Botanical Garden's Virtual Herbarium. Available at <http://sweetgum.nybg.org/ih/>
- Tropicos. 2011.** *Tropicos.org. Missouri Botanical Garden*. Available at <http://www.tropicos.org>
- Urtubey E, Stuessy TF, Tremetsberger K, Morrone JJ. 2010.** The South American Biogeographic Transition Zone: an analysis from Asteraceae. *Taxon* **59**: 505–509.
- Venn J. 1981.** *Symbolic logic*. London: Macmillan and Company.
- Waechter JL. 2002.** Padrões geográficos na flora atual do Rio Grande do Sul. *Ciência & Ambiente* **24**: 93–108.
- Zuloaga FO, Morrone O, Beltrano MJ, eds. 2008.** *Catálogo de las plantas vasculares del Cono Sur. Monographs in Systematic Botany from the Missouri Botanical Garden* **107**: 1–3486.

## SUPPORTING INFORMATION

Additional Supporting Information may be found in the online version of this article:

**Table S1.** List of endemic flowering plants from southern Brazil and their distribution in different vegetation formations. HTG, High Altitude Tropical Grasslands; LTG, Low Altitude Temperate Grasslands; SHG, Subtropical Highland Grasslands (Campos de Cima da Serra); SMF, Subtropical Mixed Forest; SSF, Subtropical Seasonal Forest; TCS, Tropical Coastal Scrub; TES, Temperate Shrubland; TRF, Tropical Forest; TRS, Tropical Savanna.

Please note: Wiley-Blackwell are not responsible for the content or functionality of any supporting materials supplied by the authors. Any queries (other than missing material) should be directed to the corresponding author for the article.
